# Supplementary material for: From the up-converting multimodal luminescent thermometer to ratiometric visual power density meter based on Er 3+ ,Yb 3+ emission
Source: Royal Society of Chemistry journal article supplement (doi:10.1039/d5mh01369k), 2025-09-17
Supplement: d5mh01369k1.pdf [file d5mh01369k1.pdf]

# Supporting Information

## From the up-converting multimodal luminescent thermometer to ratiometric visual power density meter based on $\text{Er}^{3+}$ , $\text{Yb}^{3+}$ emission

Anam Javaid<sup>1</sup>, Maja Szymczak<sup>1\*</sup>, Lukasz Marciniak<sup>1\*</sup>

<sup>1</sup> Institute of Low Temperature and Structure Research, Polish Academy of Sciences,

Okólna 2, 50-422 Wrocław, Poland

Corresponding authors: [l.marciniak@intibs.pl](mailto:l.marciniak@intibs.pl)

[m.szymczak@intibs.pl](mailto:m.szymczak@intibs.pl)

**Table S1.** Amount of the precursor used in the synthesis of  $\text{Na}_3\text{Sc}_2(\text{PO}_4)_3:\text{Er}^{3+}, 5\%\text{Yb}^{3+}$  phosphors.

| Phosphor                                                                        | $\text{Na}_2\text{CO}_3$<br>(g) | $\text{NH}_4\text{H}_2\text{PO}_4$<br>(g) | $\text{Sc}_2\text{O}_3$<br>(g) | $\text{Er}_2\text{O}_3$<br>(g) | $\text{Yb}_2\text{O}_3$<br>(g) |
|---------------------------------------------------------------------------------|---------------------------------|-------------------------------------------|--------------------------------|--------------------------------|--------------------------------|
| $\text{Na}_3\text{Sc}_2(\text{PO}_4)_3:0.5\%\text{Er}^{3+}, 5\%\text{Yb}^{3+}$  | 0.1737                          | 0.3770                                    | 0.1424                         | 0.00209                        | 0.02152                        |
| $\text{Na}_3\text{Sc}_2(\text{PO}_4)_3:0.5\%\text{Er}^{3+}, 10\%\text{Yb}^{3+}$ | 0.1689                          | 0.3667                                    | 0.1312                         | 0.00203                        | 0.04188                        |
| $\text{Na}_3\text{Sc}_2(\text{PO}_4)_3:0.5\%\text{Er}^{3+}, 15\%\text{Yb}^{3+}$ | 0.1645                          | 0.3570                                    | 0.1206                         | 0.00198                        | 0.06115                        |
| $\text{Na}_3\text{Sc}_2(\text{PO}_4)_3:0.5\%\text{Er}^{3+}, 30\%\text{Yb}^{3+}$ | 0.1524                          | 0.3307                                    | 0.0919                         | 0.00183                        | 0.11329                        |

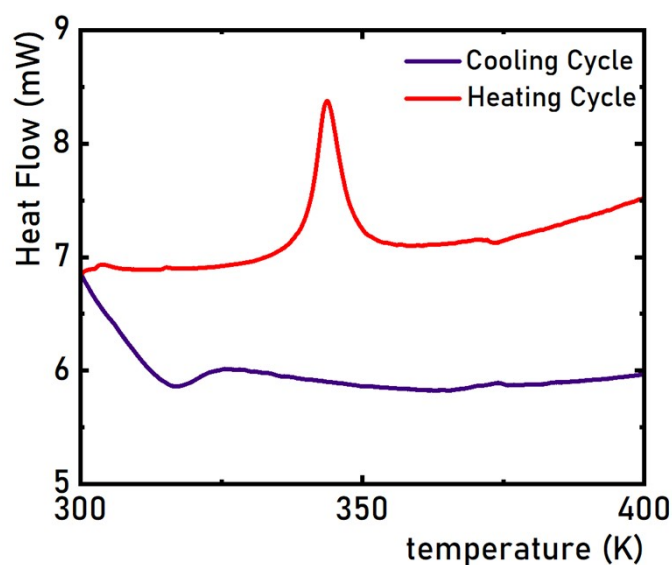

**Figure S1.** The DSC curves during heating and cooling for  $\text{Na}_3\text{Sc}_2(\text{PO}_4)_3:\text{Er}^{3+}, 5\%\text{Yb}^{3+}$

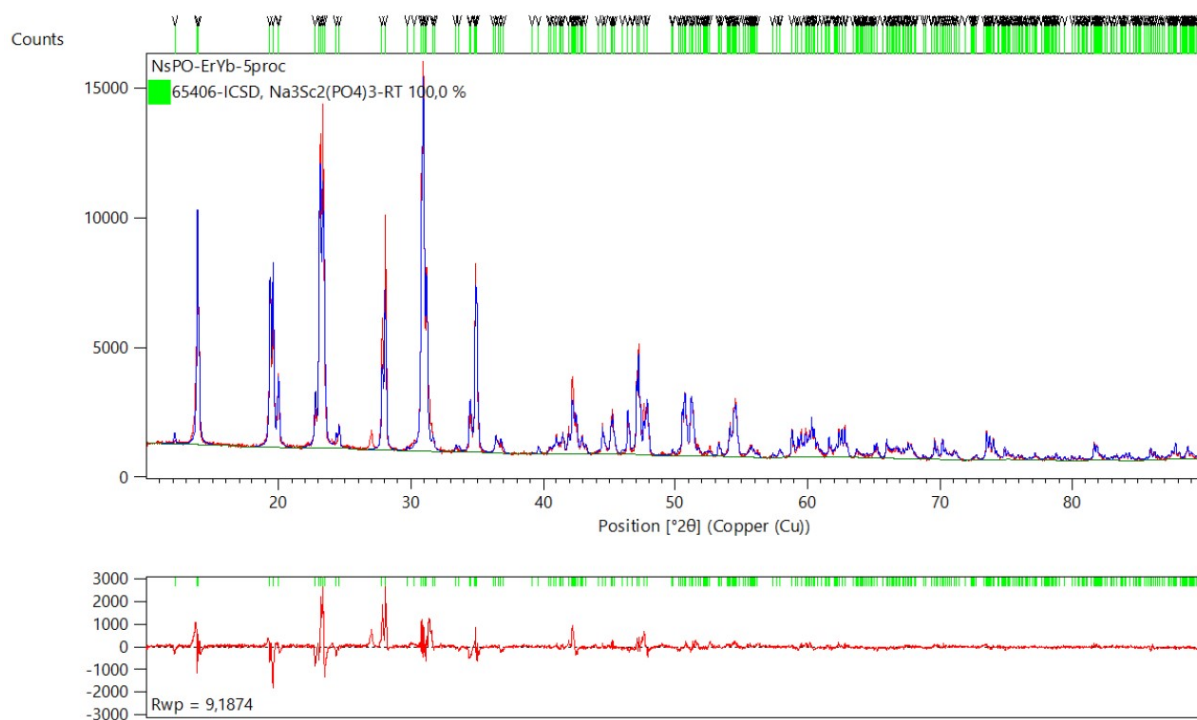

**Figure S2.** Results of Rietveld refinement of the room temperature XRD pattern of  $\text{Na}_3\text{Sc}_2(\text{PO}_4)_3:\text{Er}^{3+}, 5\%\text{Yb}^{3+}$ .

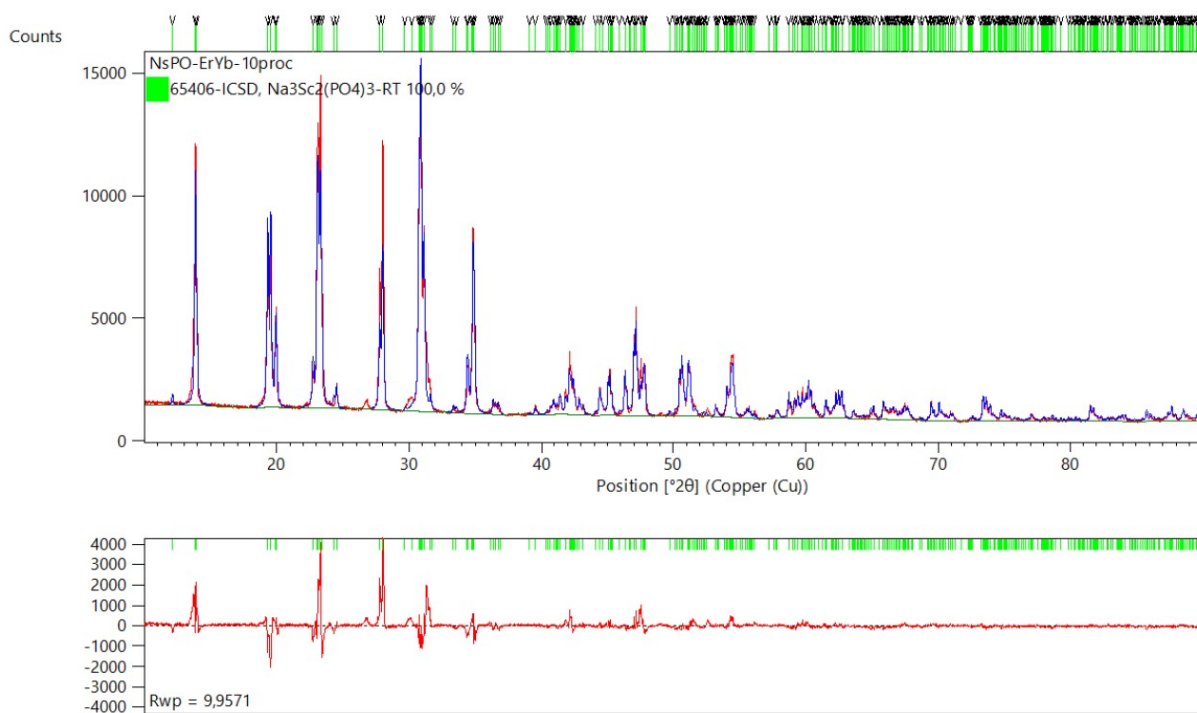

**Figure S3.** Results of Rietveld refinement of the room temperature XRD pattern of  $\text{Na}_3\text{Sc}_2(\text{PO}_4)_3:\text{Er}^{3+}, 10\%\text{Yb}^{3+}$ .

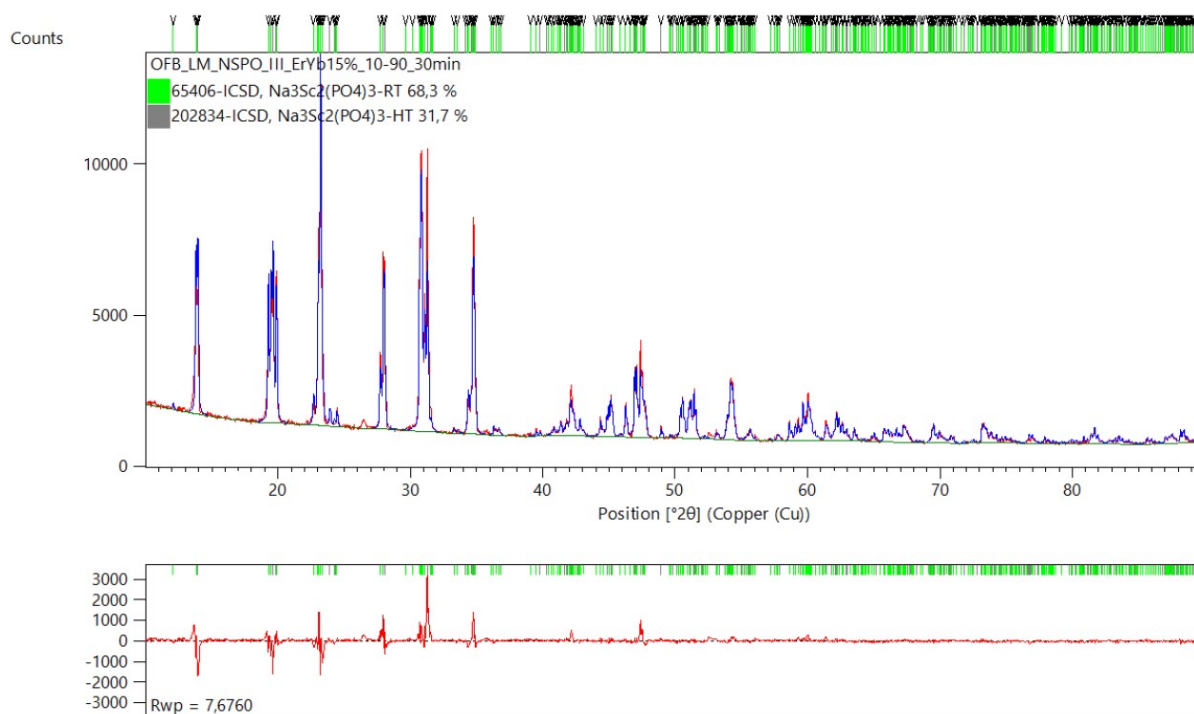

**Figure S4.** Results of Rietveld refinement of the room temperature XRD pattern of Na<sub>3</sub>Sc<sub>2</sub>(PO<sub>4</sub>)<sub>3</sub>:Er<sup>3+</sup>, 15%Yb<sup>3+</sup>.

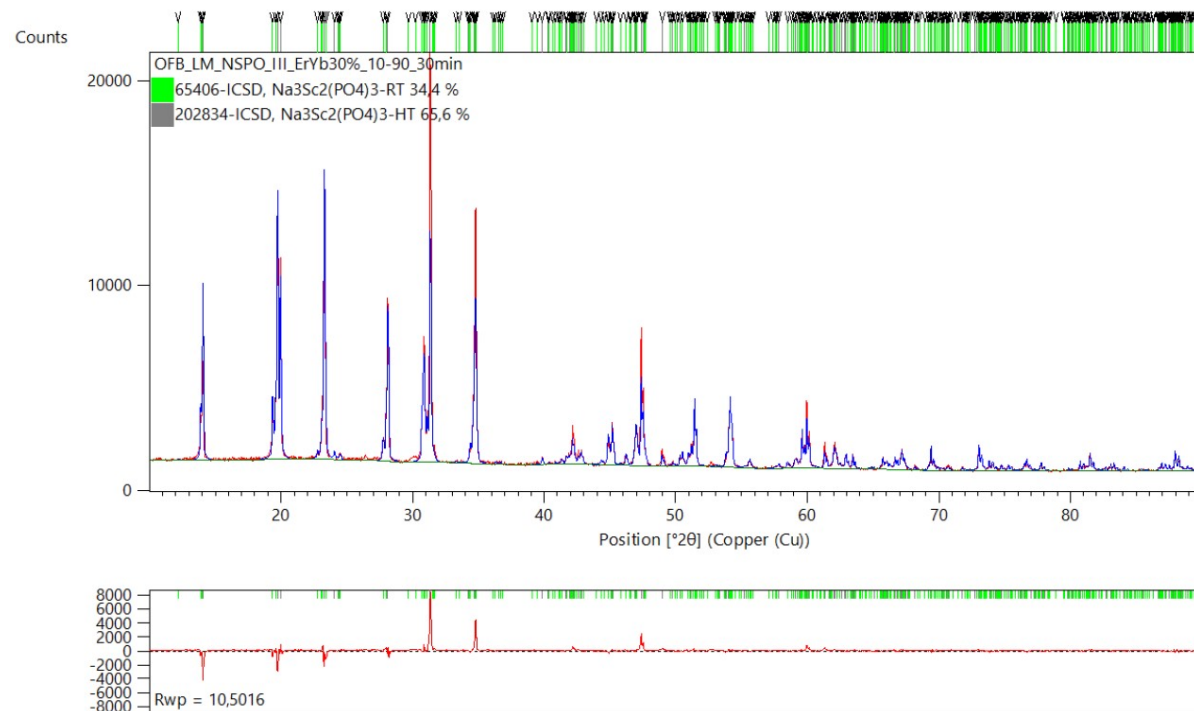

**Figure S5.** Results of Rietveld refinement of the room temperature XRD pattern of Na<sub>3</sub>Sc<sub>2</sub>(PO<sub>4</sub>)<sub>3</sub>:Er<sup>3+</sup>, 30%Yb<sup>3+</sup>.

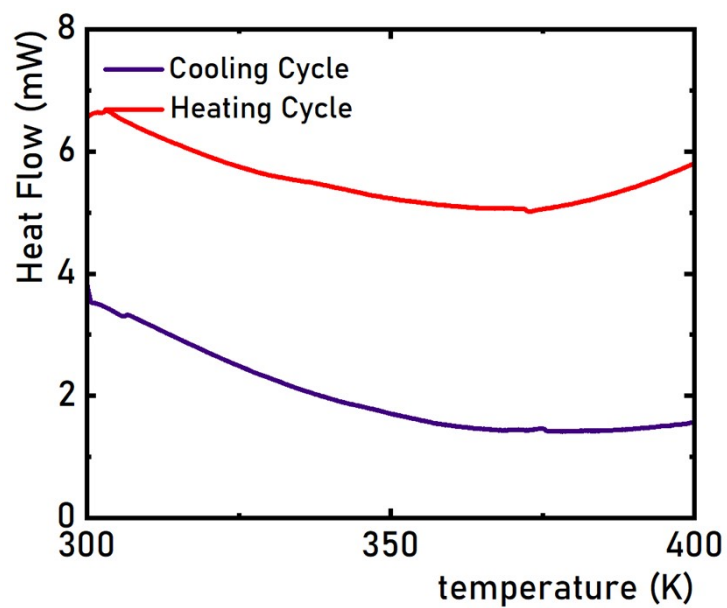

**Figure S6.** The DSC curves during heating and cooling for  $\text{Na}_3\text{Sc}_2(\text{PO}_4)_3:\text{Er}^{3+}, 30\%\text{Yb}^{3+}$

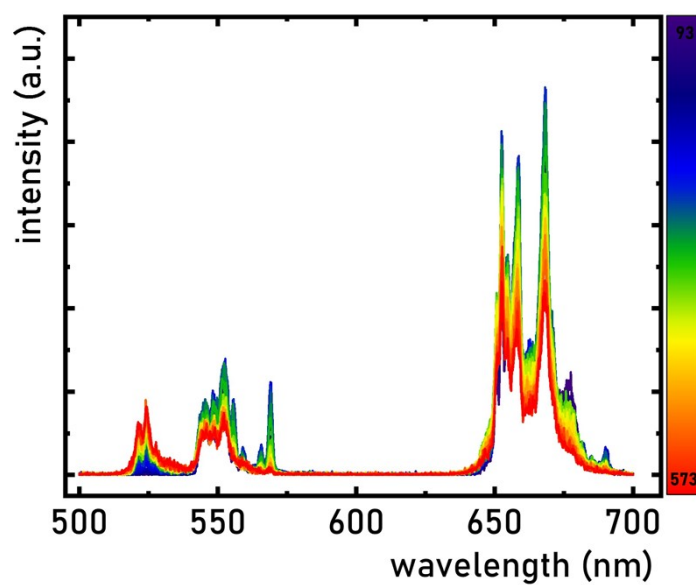

**Figure S7.** Up-conversion emission spectra of  $\text{Na}_3\text{Sc}_2(\text{PO}_4)_3:\text{Er}^{3+}, 5\%\text{Yb}^{3+}$  measured as a function of temperature.

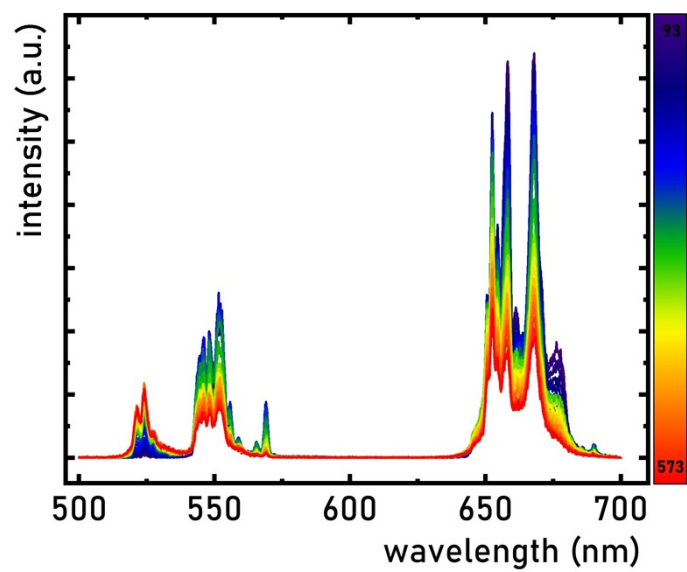

**Figure S8.** Up-conversion emission spectra of  $\text{Na}_3\text{Sc}_2(\text{PO}_4)_3:\text{Er}^{3+}, 10\%\text{Yb}^{3+}$  measured as a function of temperature.

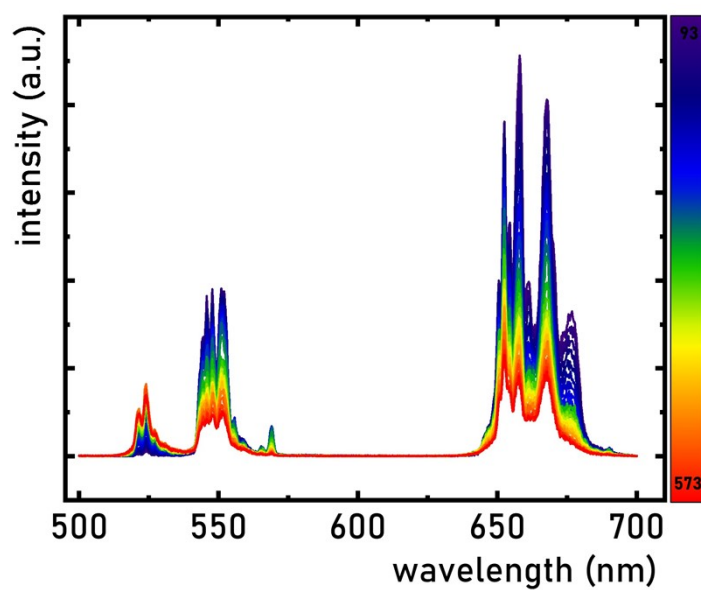

**Figure S9.** Up-conversion emission spectra of  $\text{Na}_3\text{Sc}_2(\text{PO}_4)_3:\text{Er}^{3+}, 15\%\text{Yb}^{3+}$  measured as a function of temperature.

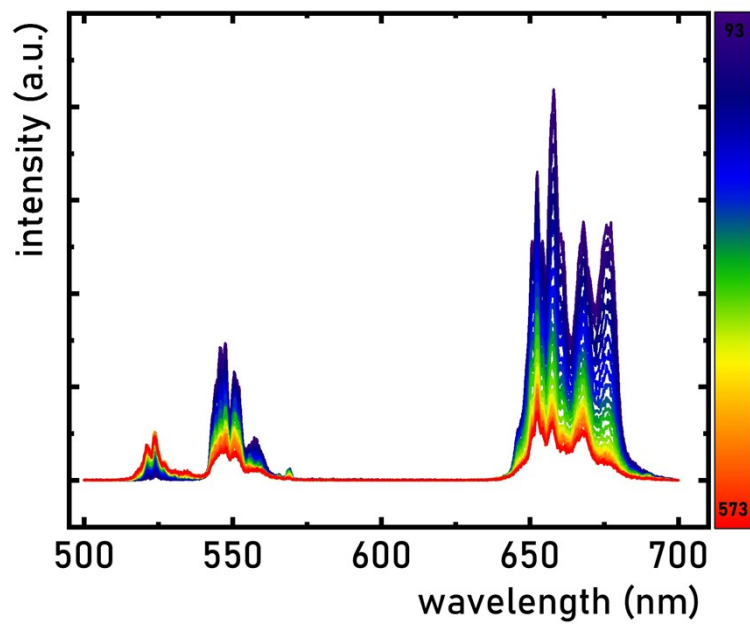

**Figure S10.** Up-conversion emission spectra of  $\text{Na}_3\text{Sc}_2(\text{PO}_4)_3:\text{Er}^{3+}, 30\%\text{Yb}^{3+}$  measured as a function of temperature.

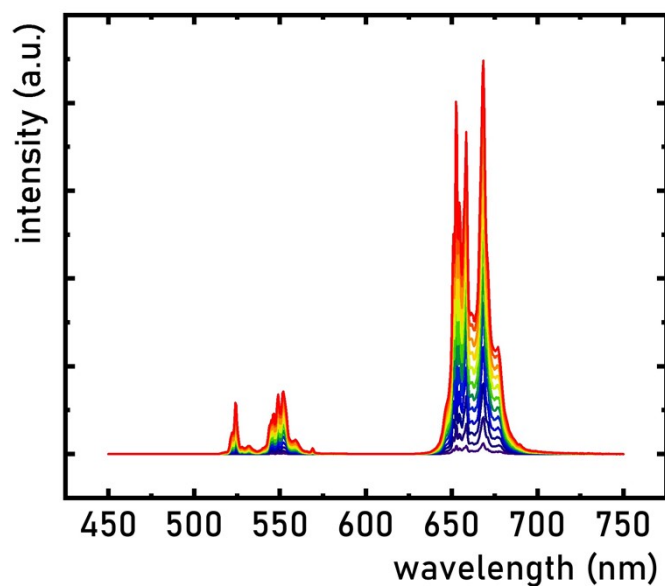

**Figure S11.** Up-conversion emission spectra of  $\text{Na}_3\text{Sc}_2(\text{PO}_4)_3:\text{Er}^{3+}, 5\%\text{Yb}^{3+}$  measured as a function of excitation density from  $2.1 \text{ W cm}^{-2}$  (navy curve) to  $114 \text{ W cm}^{-2}$  (red curve).

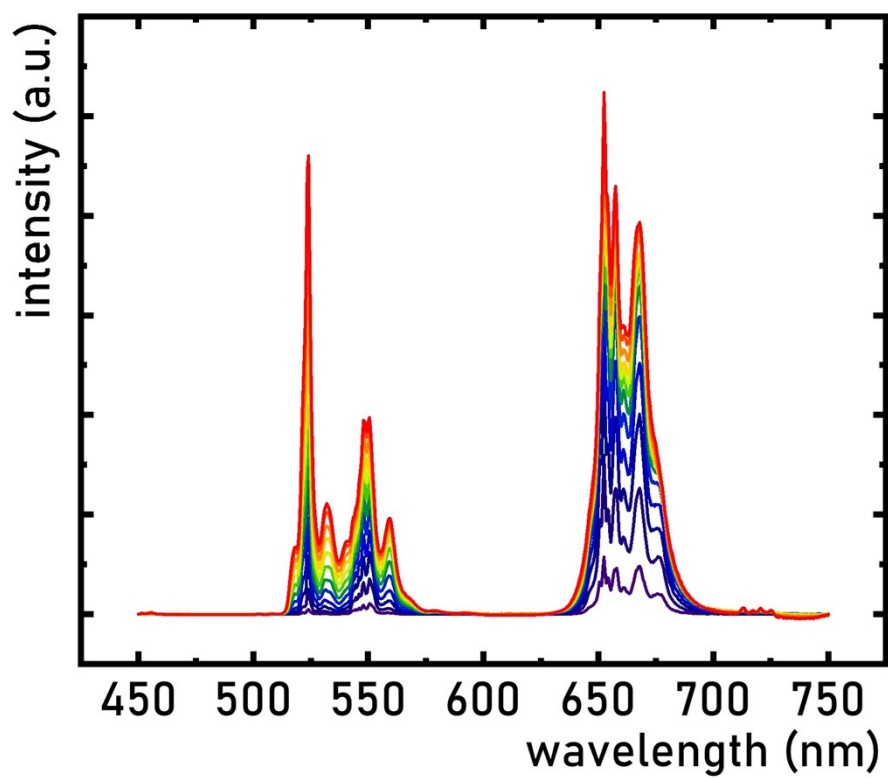

**Figure S12.** Up-conversion emission spectra of  $\text{Na}_3\text{Sc}_2(\text{PO}_4)_3:\text{Er}^{3+}, 30\%\text{Yb}^{3+}$  measured as a function of excitation density from  $2.1 \text{ W cm}^{-2}$  (navy curve) to  $114 \text{ W cm}^{-2}$  (red curve).

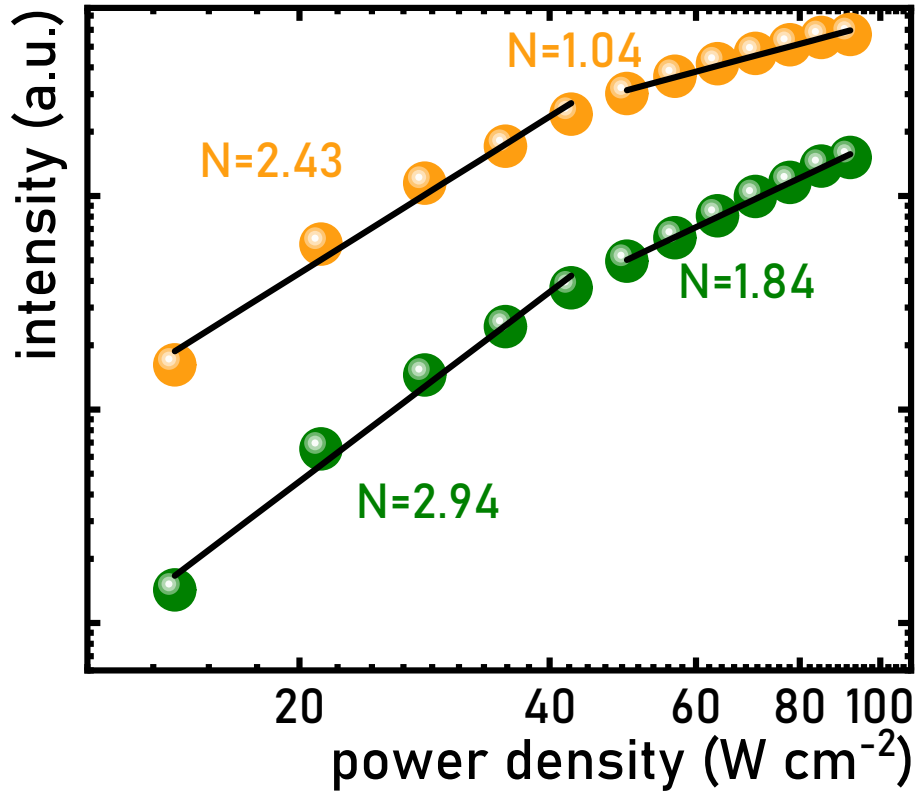

**Figure S13.** The log-log plots of the total emission intensity in the green spectral region corresponding to the  $^4S_{3/2} \rightarrow ^4I_{15/2}$ ,  $^2H_{9/2} \rightarrow ^4I_{13/2}$  and  $^2H_{11/2} \rightarrow ^4I_{15/2}$  as a function of excitation density for  $\text{Na}_3\text{Sc}_2(\text{PO}_4)_3:\text{Er}^{3+}$ , 5% $\text{Yb}^{3+}$  (green points) and  $\text{Na}_3\text{Sc}_2(\text{PO}_4)_3:\text{Er}^{3+}$ , 30% $\text{Yb}^{3+}$  (orange points).

Absolute sensitivity can be calculated as follows:

$$S_A = \frac{\Delta LIR}{\Delta T} \quad (\text{S1})$$

where  $\Delta LIR$  is a change of LIR corresponding to change in temperature by  $\Delta T$ .



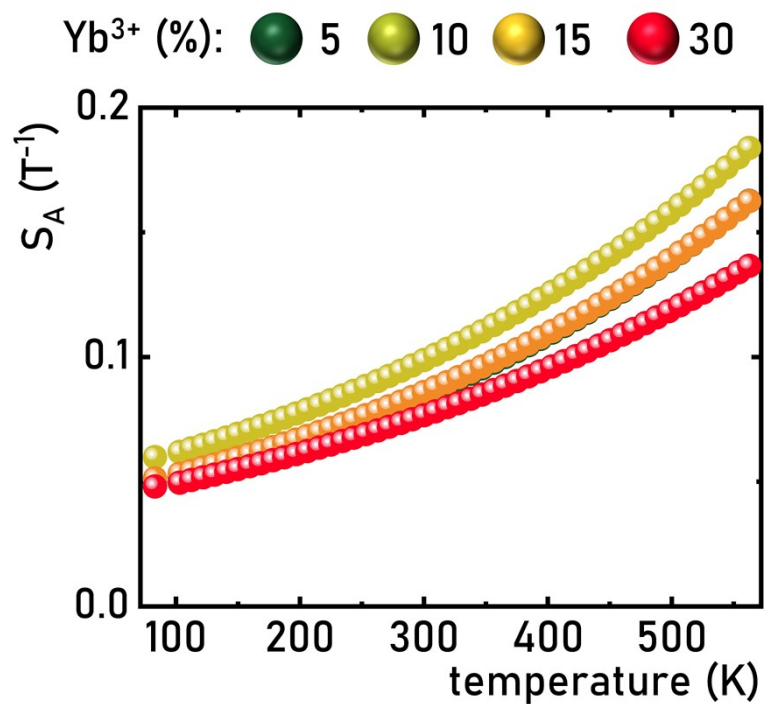

**Figure S14.** Thermal dependence of  $S_A$  corresponding to  $LIR_1$  for  $\text{Na}_3\text{Sc}_2(\text{PO}_4)_3:\text{Er}^{3+}, \text{Yb}^{3+}$ .

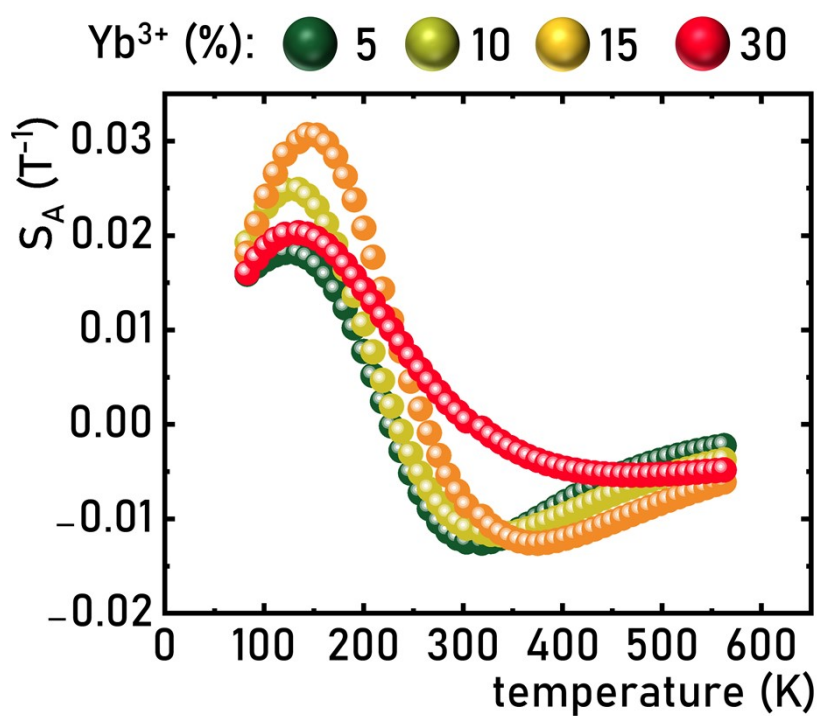

**Figure S15.** Thermal dependence of  $S_A$  corresponding to  $LIR_2$  for  $\text{Na}_3\text{Sc}_2(\text{PO}_4)_3:\text{Er}^{3+}, \text{Yb}^{3+}$ .

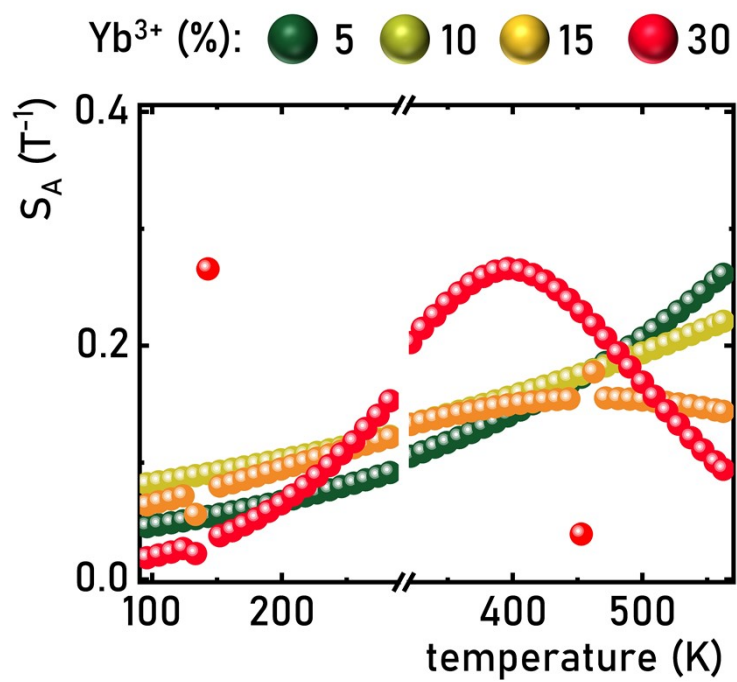

**Figure S16.** Thermal dependence of  $S_A$  corresponding to  $LIR_3$  for  $\text{Na}_3\text{Sc}_2(\text{PO}_4)_3:\text{Er}^{3+}, \text{Yb}^{3+}$ .

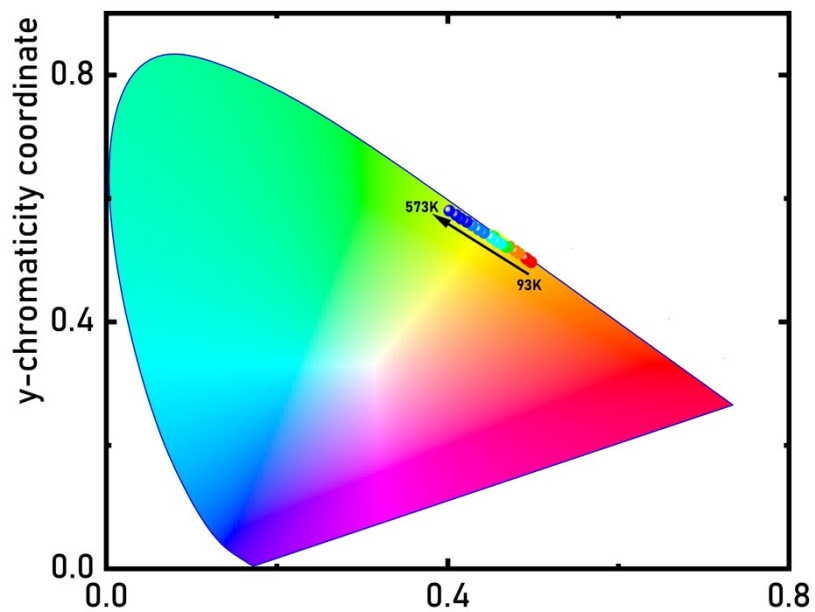

**Figure S17.** CIE 1931 chromatic coordinates calculated for  $\text{Na}_3\text{Sc}_2(\text{PO}_4)_3:\text{Er}^{3+}, 5\%\text{Yb}^{3+}$  as a function of temperature.

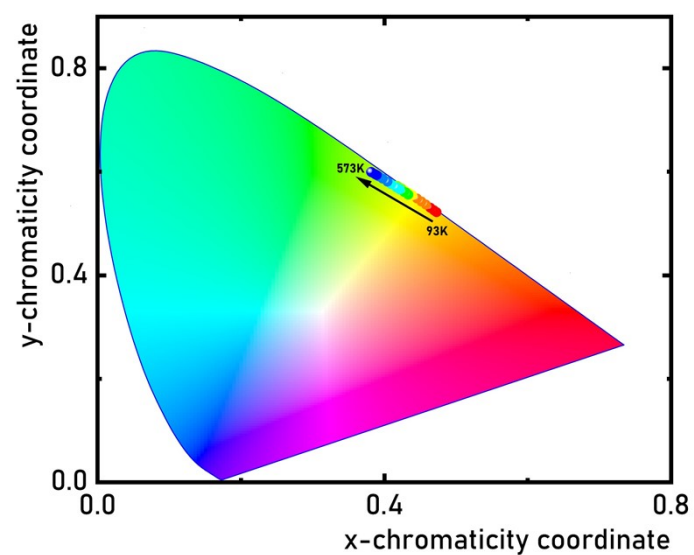

**Figure S18.** CIE 1931 chromatic coordinates calculated for  $\text{Na}_3\text{Sc}_2(\text{PO}_4)_3:\text{Er}^{3+}, 10\%\text{Yb}^{3+}$  as a function of temperature.

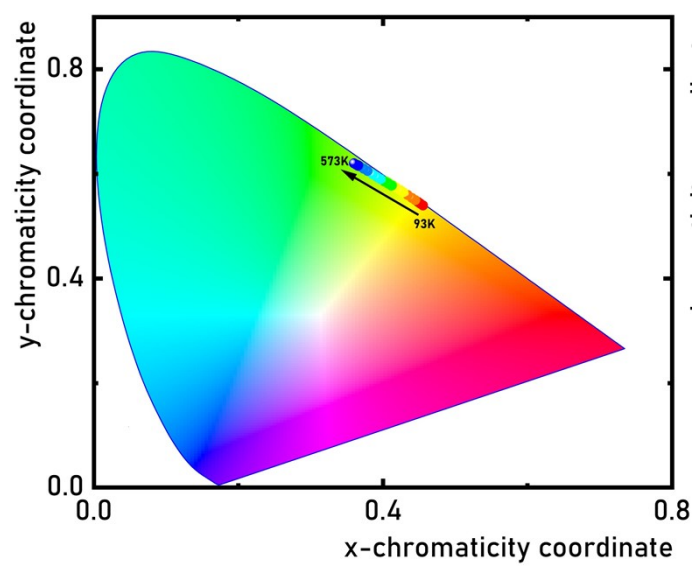

**Figure S19.** CIE 1931 chromatic coordinates calculated for  $\text{Na}_3\text{Sc}_2(\text{PO}_4)_3:\text{Er}^{3+}, 15\%\text{Yb}^{3+}$  as a function of temperature.

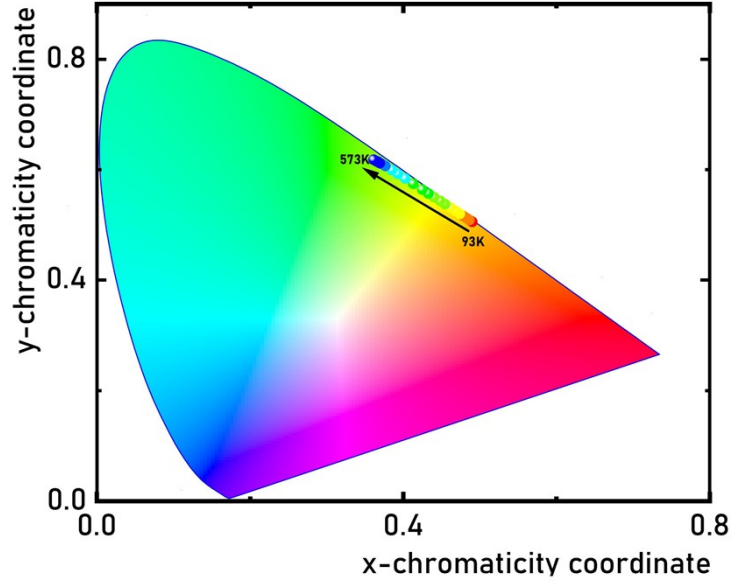

**Figure S20.** CIE 1931 chromatic coordinates calculated for  $\text{Na}_3\text{Sc}_2(\text{PO}_4)_3:\text{Er}^{3+}, 30\%\text{Yb}^{3+}$  as a function of temperature.

The relative sensitivity of the analyzed phosphors to the excitation density based on the CIE1931 chromatic coordinates can be calculated as follows:

$$S_{R,x} = \frac{1}{x} \frac{\Delta x}{\Delta p} \cdot 100\% \quad (\text{S2})$$

$$S_{R,y} = \frac{1}{y} \frac{\Delta y}{\Delta p} \cdot 100\% \quad (\text{S3})$$

where  $\Delta x$  and  $\Delta y$  represent change in x and y coordinates, respectively, corresponding to the change in excitation density by  $\Delta p$ .

**Table S2.** CIE1931 chromatic coordinates calculated for  $\text{Na}_3\text{Sc}_2(\text{PO}_4)_3:\text{Er}^{3+}, 5\%\text{Yb}^{3+}$  and  $\text{Na}_3\text{Sc}_2(\text{PO}_4)_3:\text{Er}^{3+}, 30\%\text{Yb}^{3+}$  as a function of excitation density.

| Power density<br>[W cm <sup>-2</sup> ] | 5%Yb <sup>3+</sup> |          | 30%Yb <sup>3+</sup> |          |
|----------------------------------------|--------------------|----------|---------------------|----------|
|                                        | <i>x</i>           | <i>y</i> | <i>x</i>            | <i>y</i> |
| 14.15428                               | 0.62118            | 0.37647  | 0.55575             | 0.43925  |
| 21.23142                               | 0.60074            | 0.3975   | 0.51993             | 0.4729   |
| 28.30856                               | 0.58638            | 0.41044  | 0.49084             | 0.49972  |
| 35.3857                                | 0.57588            | 0.42034  | 0.47032             | 0.51856  |
| 42.46285                               | 0.56657            | 0.42881  | 0.44874             | 0.53839  |

|          |         |         |         |         |
|----------|---------|---------|---------|---------|
| 49.53999 | 0.55952 | 0.43581 | 0.43142 | 0.55442 |
| 56.61713 | 0.55138 | 0.44325 | 0.4132  | 0.57115 |
| 63.69427 | 0.54406 | 0.45002 | 0.39708 | 0.5858  |
| 70.77141 | 0.53607 | 0.4574  | 0.38219 | 0.59934 |
| 77.84855 | 0.53057 | 0.46257 | 0.37389 | 0.60696 |
| 84.92569 | 0.52244 | 0.47018 | 0.36544 | 0.6147  |
| 92.00283 | 0.51917 | 0.4734  | 0.36179 | 0.61806 |

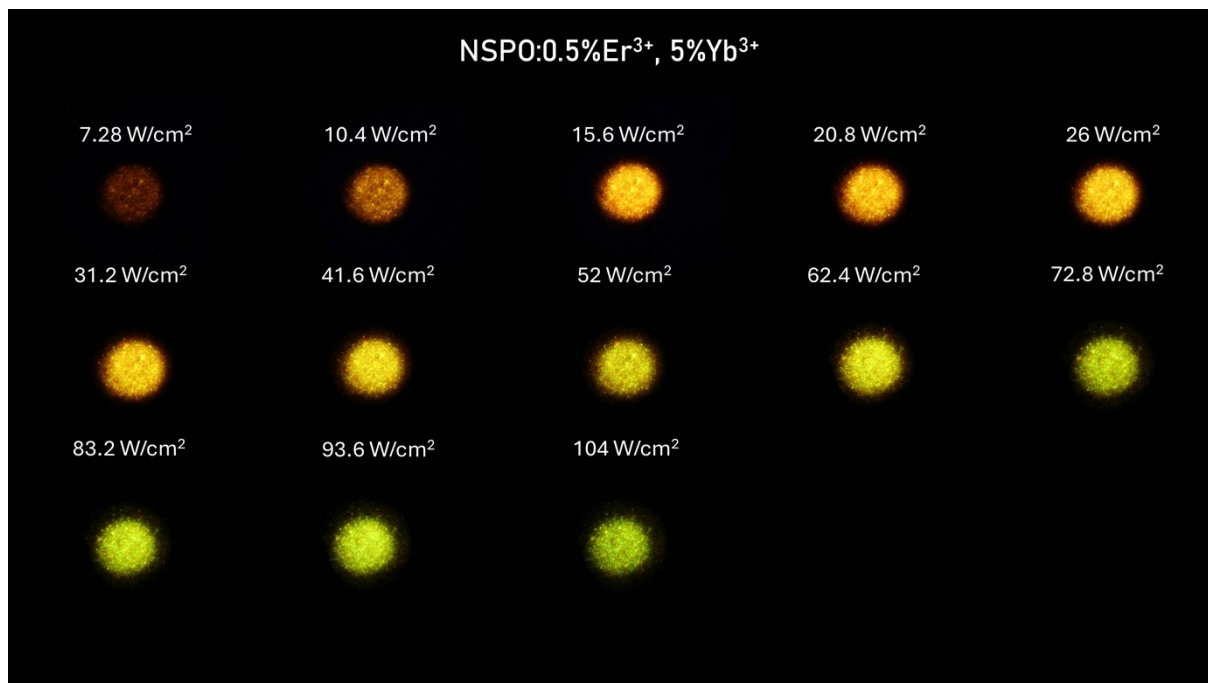

**Figure S21.** Photos of up-conversion emission of Na<sub>3</sub>Sc<sub>2</sub>(PO<sub>4</sub>)<sub>3</sub>:Er<sup>3+</sup>, 5%Yb<sup>3+</sup> at different excitation densities.

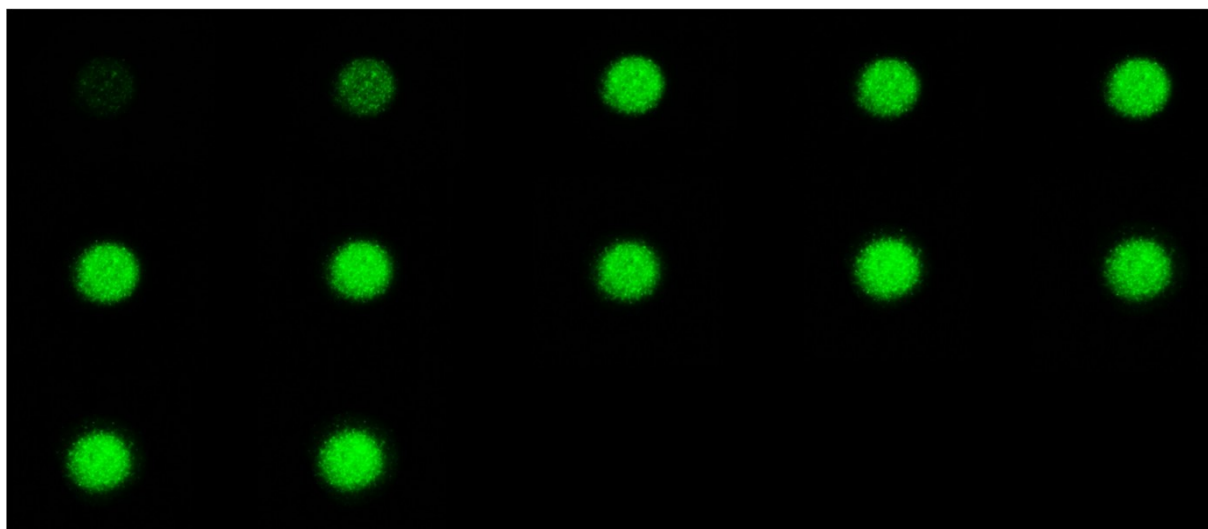

**Figure S22.** Maps of signal recorded in green channel extracted from photos presented in Figure S13.

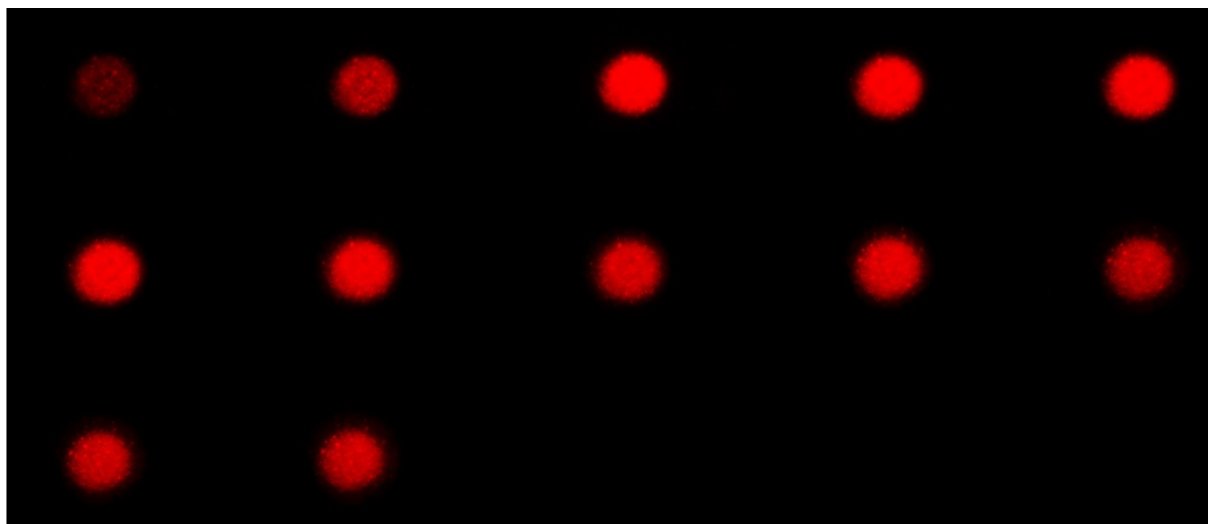

**Figure S23.** Maps of signal recorded in red channel extracted from photos presented in Figure S13.

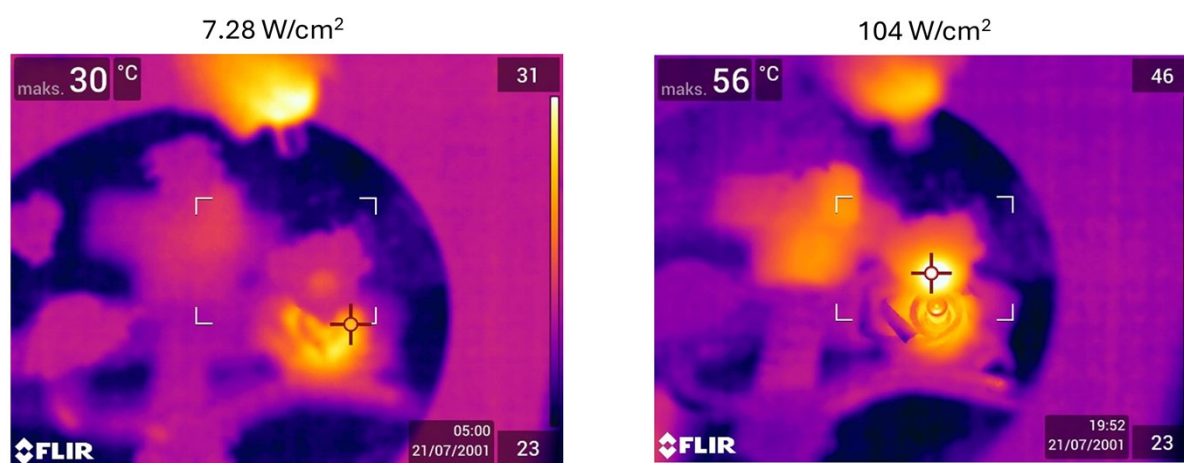

**Figure S24.** Temperature of  $\text{Na}_3\text{Sc}_2(\text{PO}_4)_3:\text{Er}^{3+}, 5\%\text{Yb}^{3+}$  upon different excitation densities recorded using thermovision camera.

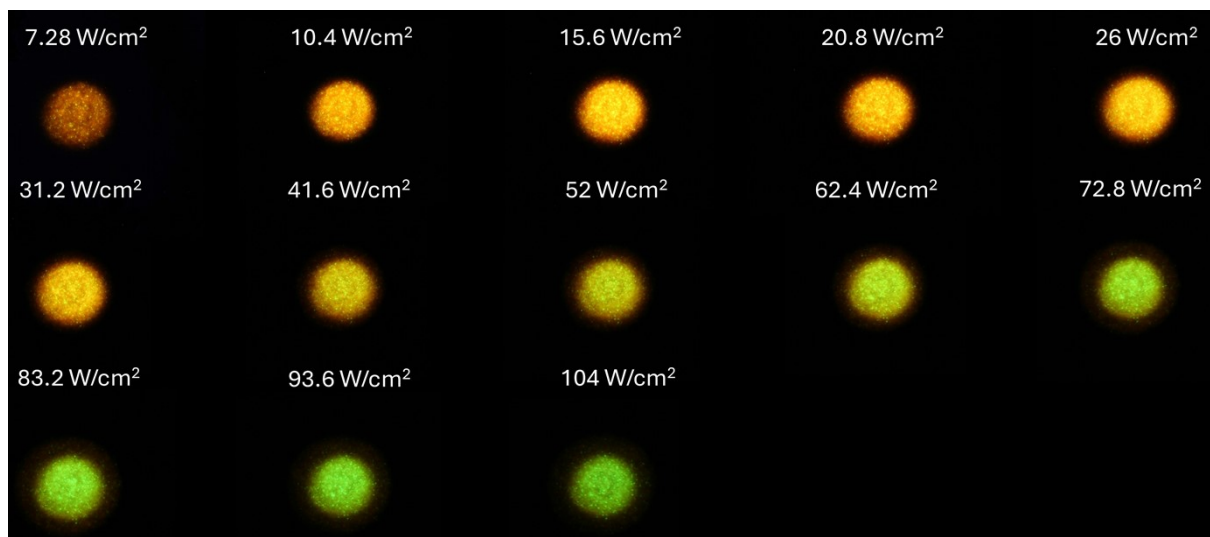

**Figure S25.** Photos of up-conversion emission of  $\text{Na}_3\text{Sc}_2(\text{PO}_4)_3:\text{Er}^{3+}, 30\%\text{Yb}^{3+}$  at different excitation densities.

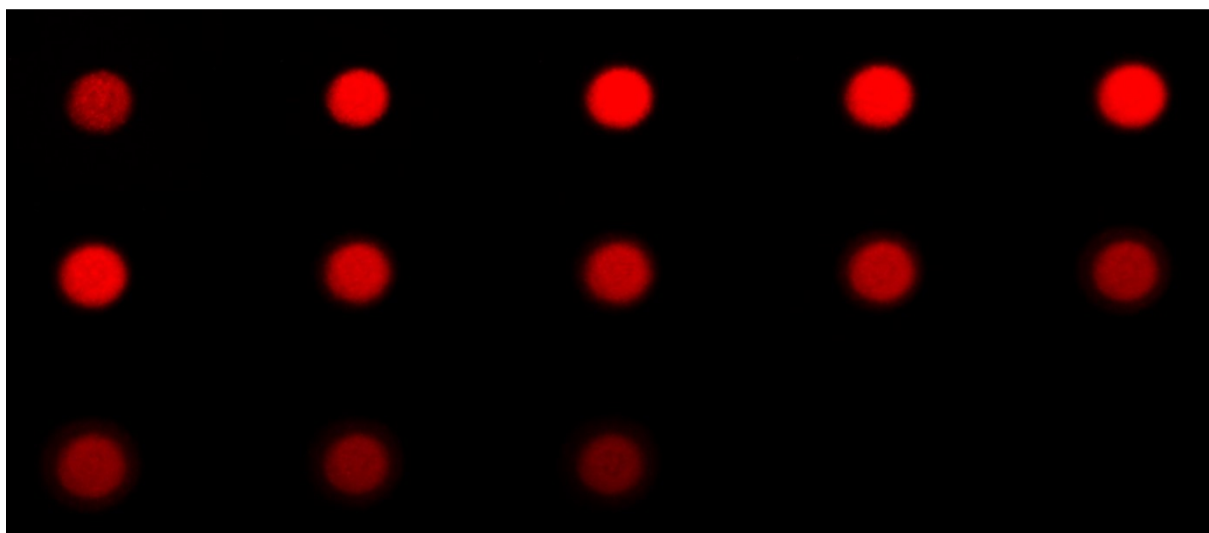

**Figure S26.** Maps of signal recorded in red channel extracted from photos presented in Figure S17.



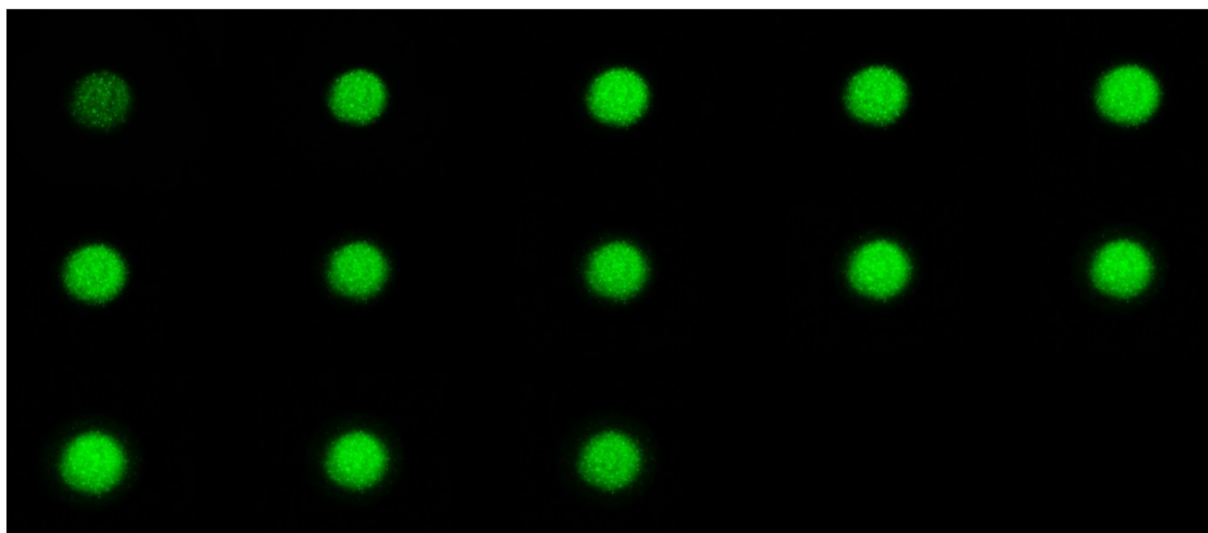

**Figure S27.** Maps of signal recorded in green channel extracted from photos presented in Figure S17.

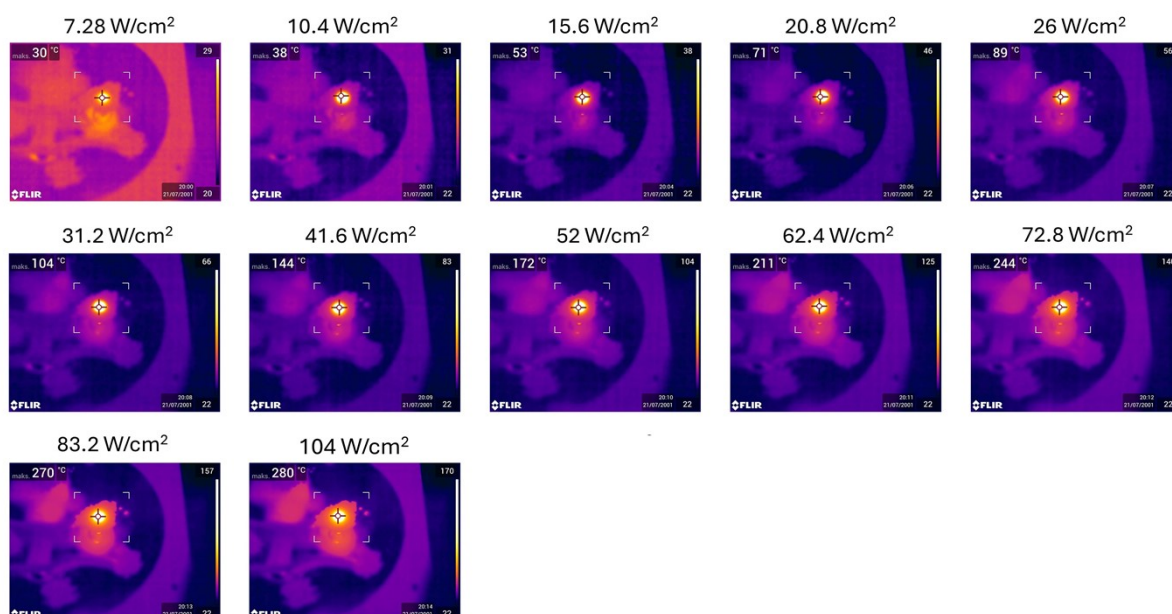

**Figure S28.** Temperature of  $\text{Na}_3\text{Sc}_2(\text{PO}_4)_3:\text{Er}^{3+}, 30\%\text{Yb}^{3+}$  upon different excitation densities recorded using thermovision camera.

**Table S3.** The values of the CIE1931 chromatic coordinates obtained for up-conversion emission for 4 different system alignments (changed excitation power and distance from the focal point).

| Power<br>[W] | Spot<br>diameter<br>[cm] | Distance<br>from the<br>focal<br>[cm] | Excitation<br>density<br>[W cm-2] | CIE 1931 |          |
|--------------|--------------------------|---------------------------------------|-----------------------------------|----------|----------|
|              |                          |                                       |                                   | <i>x</i> | <i>y</i> |
| 0.8          | 0.12                     | ~0.1                                  | 70.77                             | 0.379    | 0.597    |
| 1.7          | 0.175                    | 0.15                                  | 70.71                             | 0.379    | 0.596    |
| 1.44         | 0.16                     | 0.138                                 | 71.65                             | 0.378    | 0.601    |



|     |      |      |       |       |       |
|-----|------|------|-------|-------|-------|
| 2.4 | 0.21 | 0.18 | 69.32 | 0.384 | 0.594 |
|-----|------|------|-------|-------|-------|
